# Supplementary material
Source: Research Square preprint supplement (doi:10.21203/rs.3.rs-9796263/v1)
Supplement: Supplementary file 1 [file 71134f2206d0e2482885848a.docx]

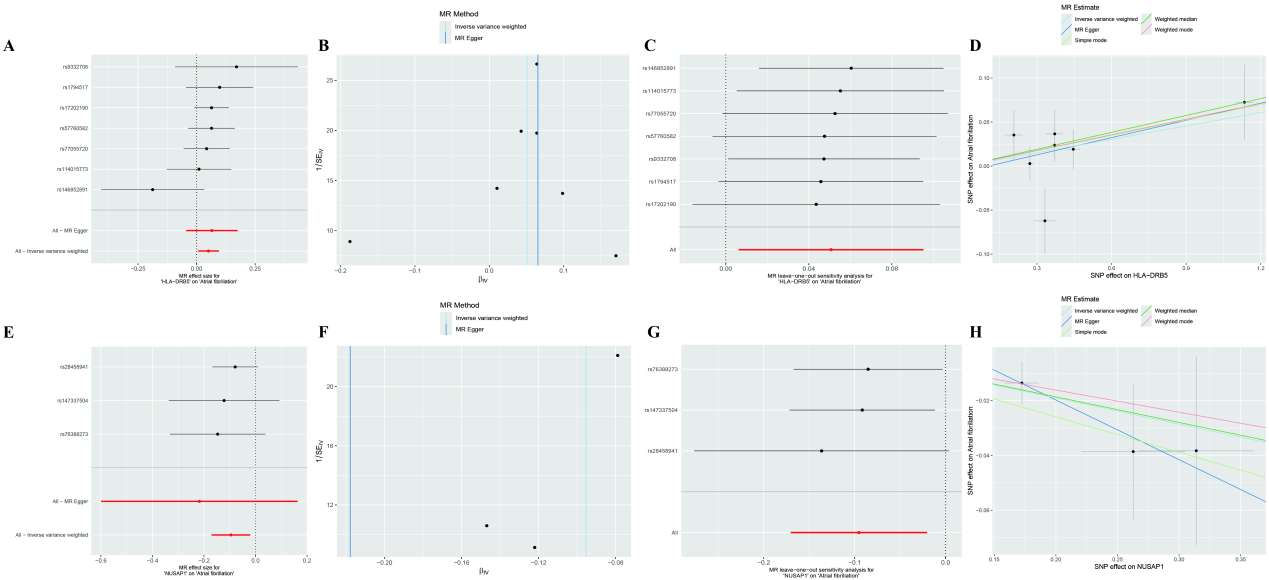


**Figure S2. Sensitivity analyses of Mendelian randomization.** A-D. Forest plot, funnel plot, leave-one-out analysis, and scatter plot for HLA-DRB5. E-H. Forest plot, funnel plot, leave-one-out analysis, and scatter plot for NUSAP1.
