# Supplementary material
Source: Research Square preprint supplement (doi:10.21203/rs.3.rs-9796263/v1)
Supplement: Supplementary file 3 [file 9fa67ae2655c2c2a8a0b1420.docx]

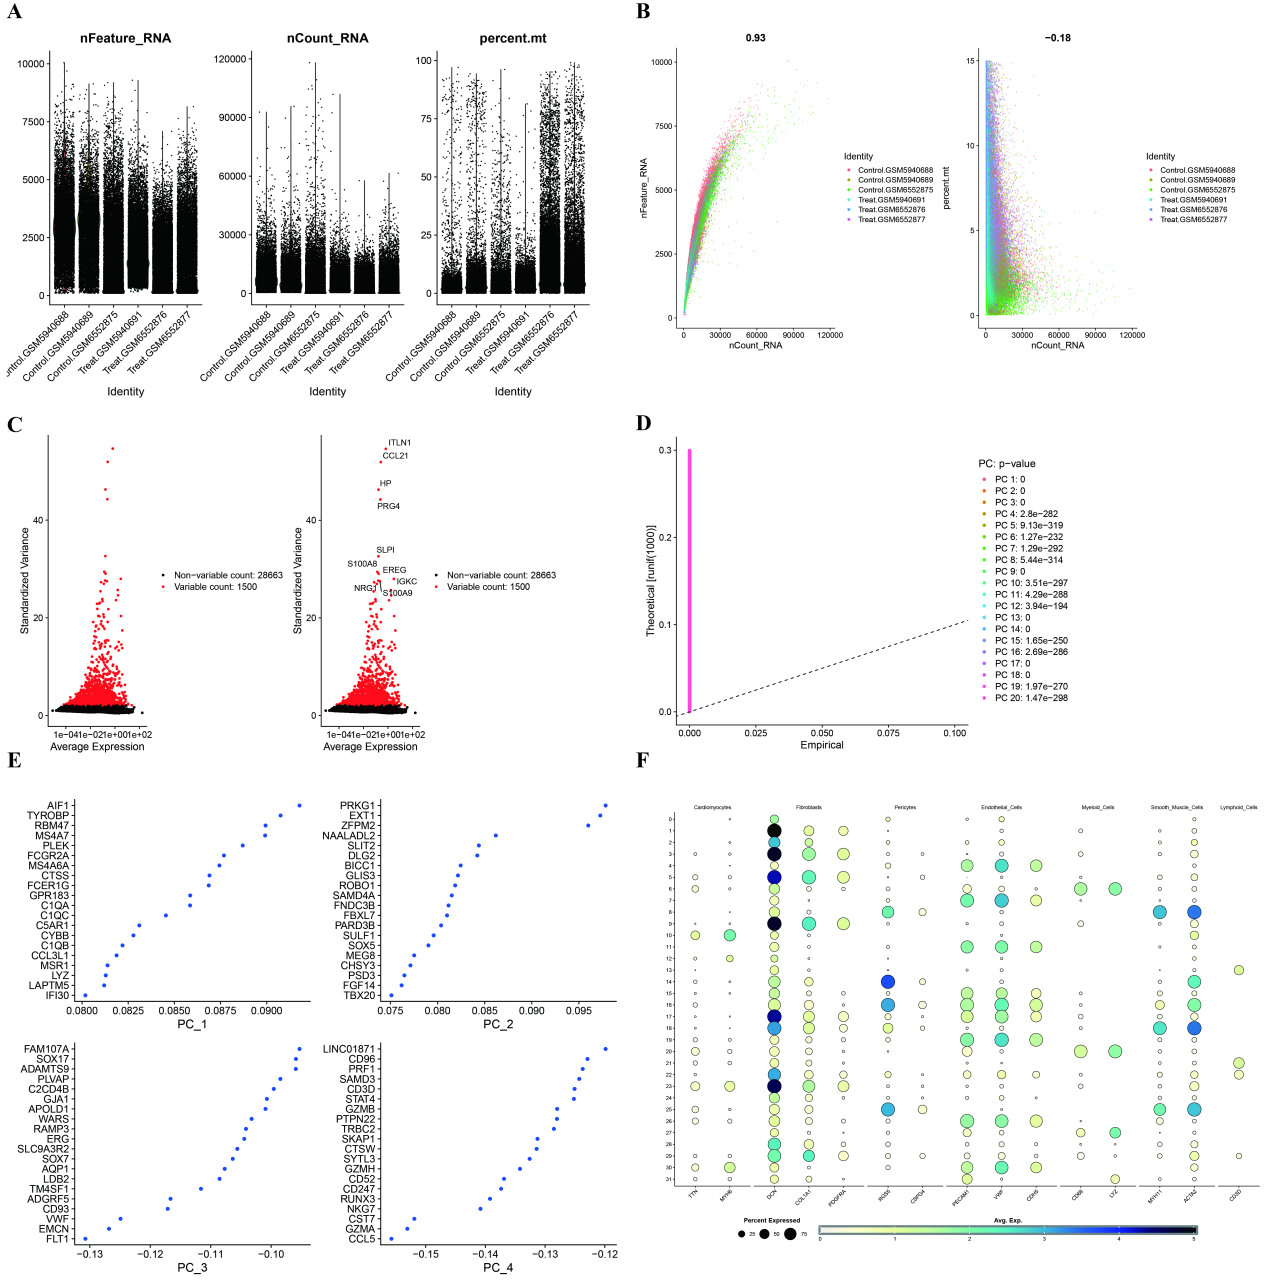


**Figure S1. Quality control and feature selection of single-cell transcriptomic data.** A. Violin plots showing the distribution of key quality control metrics (number of detected genes, total counts, and mitochondrial gene percentage) across cells. B. Scatter plots evaluating correlations among quality control metrics. C. Mean expression versus variance plot for highly variable gene selection, with the top 1,500 highly variable genes highlighted in red. D. JackStraw plot assessing the significance of principal components. E. Gene loadings for the top 4 principal components. F. Bubble plot showing expression patterns of canonical marker genes across annotated cell types, with dot size representing the percentage of expressing cells and color intensity representing the average expression level.
